# Supplementary material for: A pair of congenic mice for imaging of transplants by positron emission tomography using anti-transferrin receptor nanobodies
Source: eLife journal article supplement (doi:10.7554/elife.104302), 2025-01-07

Source Gel, Figure 1A, left panel

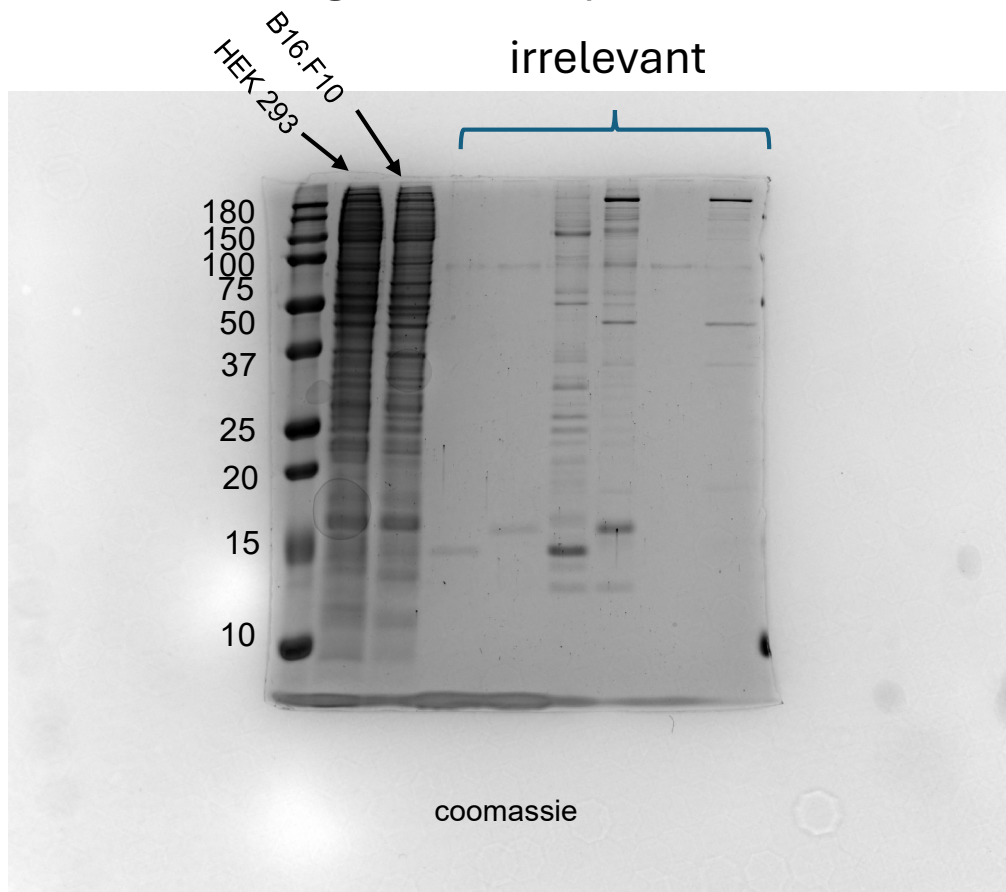

Source Gel, Figure 1A, middle panel

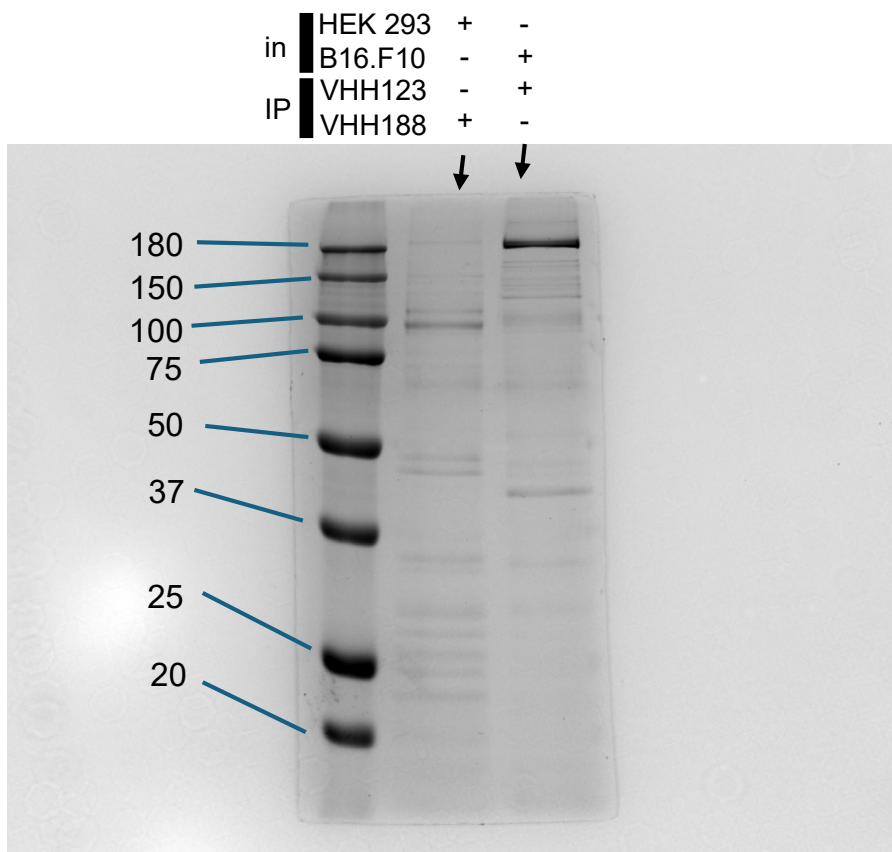

Source Gel, Figure 1A, right panel

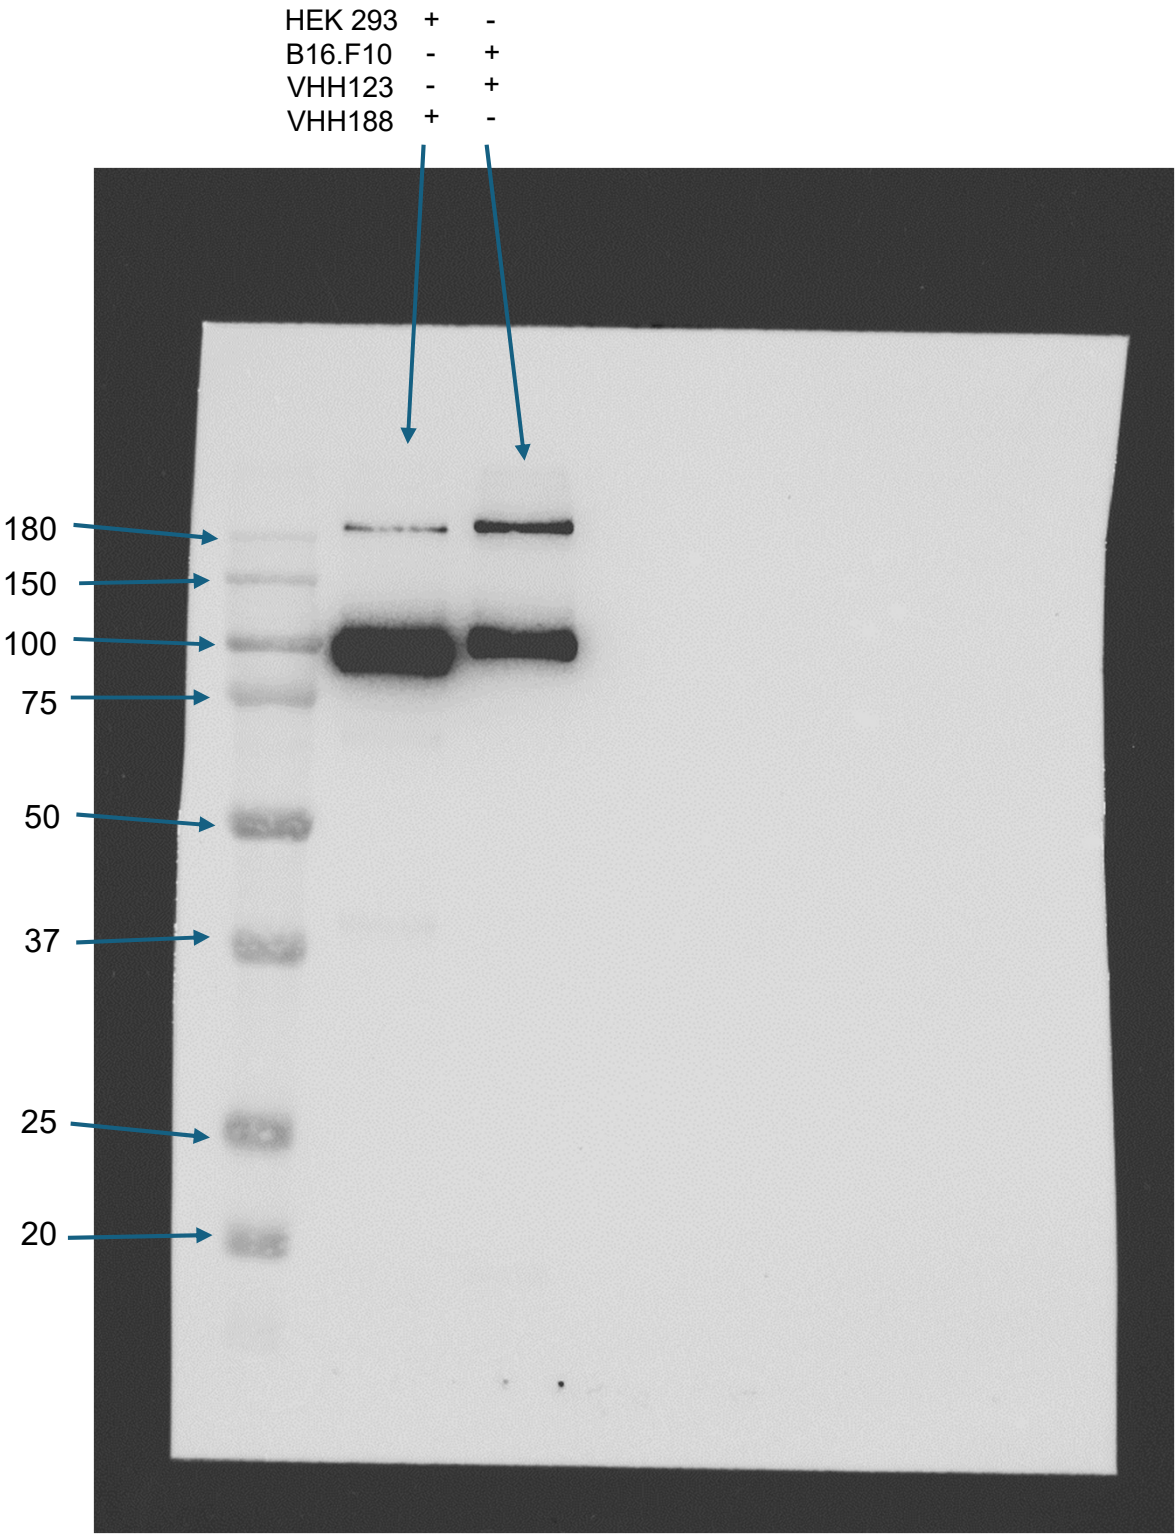

a-Tfr blot

Source Ladder, Figure 1B, HEK293T cells  
(mislabelled as '29B16F10 cells')

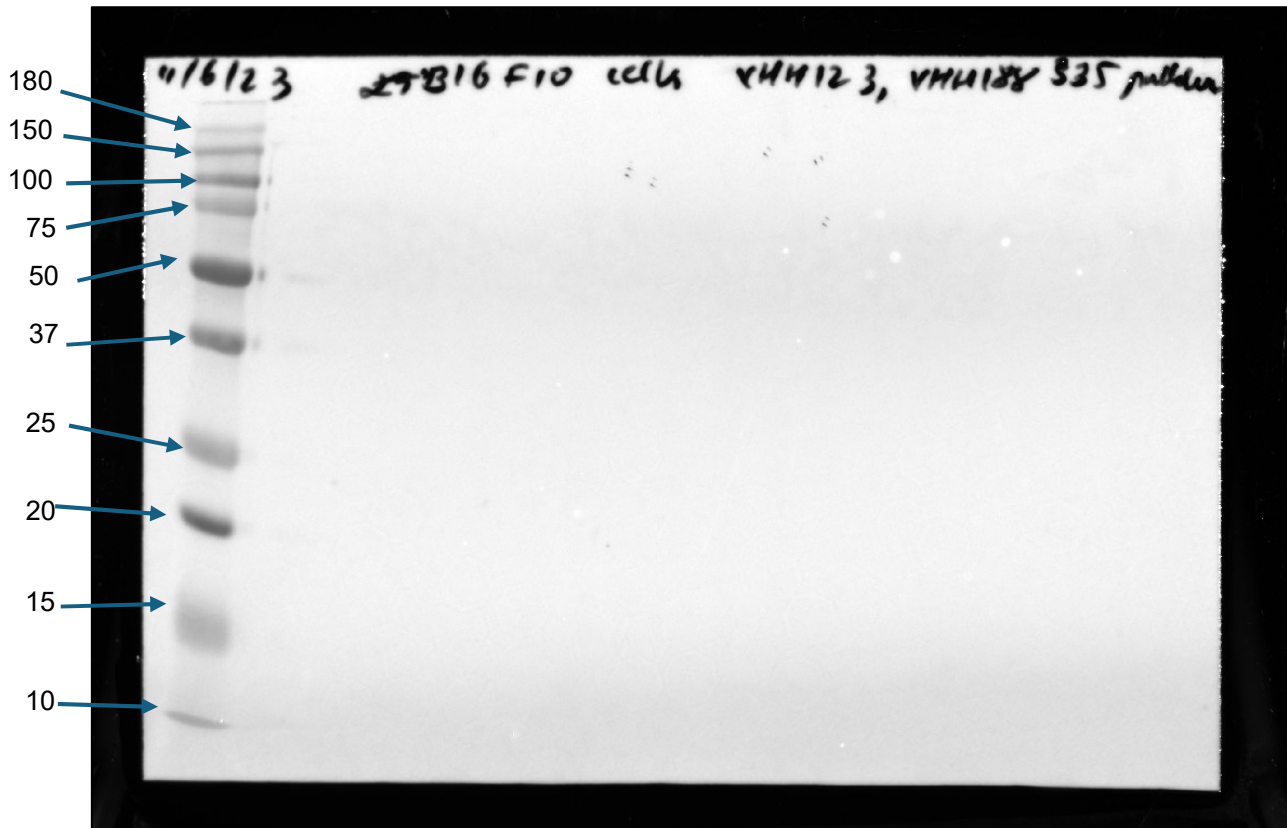

Source Blot, Figure 1B, HEK293T cells

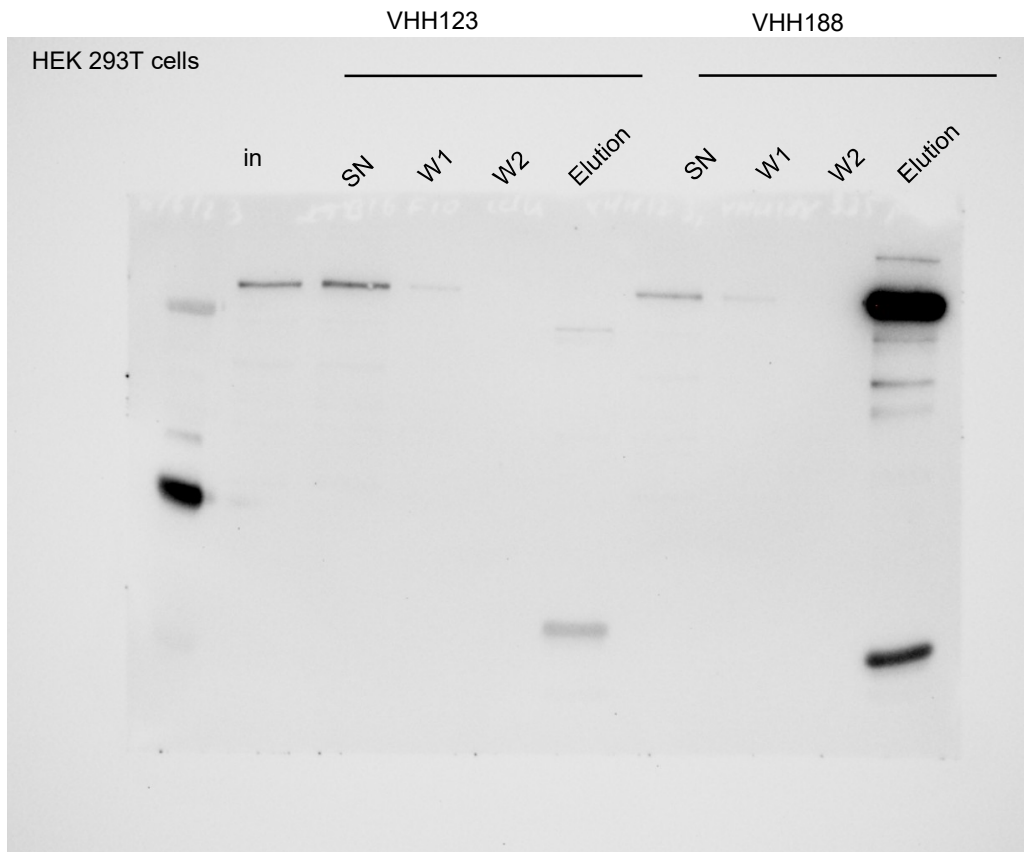

Source Blot, Figure 1B, B16F10 cells  
(mislabelled on blot as '293T cells')

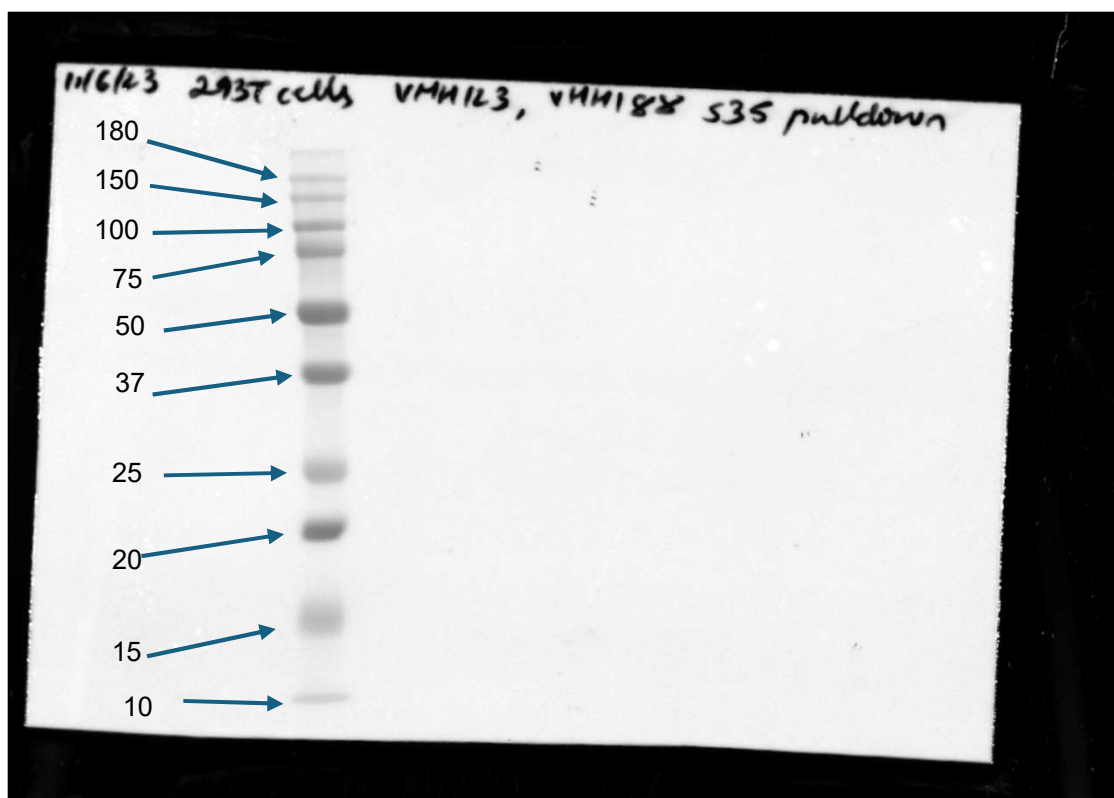

Source Blot, Figure 1B, B16F10 cells

B16.F10 cells

VHH123

VHH188

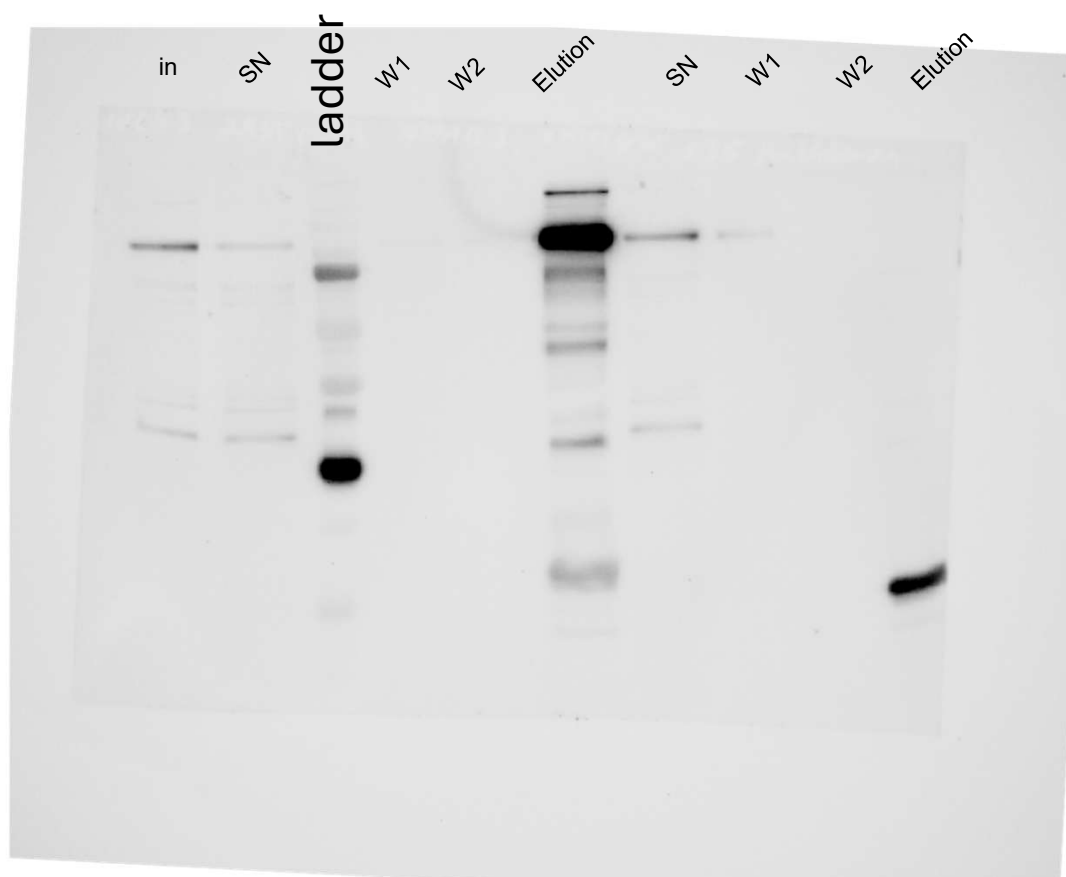

Supplement: fig1-data1 [file elife-104302-fig1-data1-v1.zip]
