# Supplementary material for: A pair of congenic mice for imaging of transplants by positron emission tomography using anti-transferrin receptor nanobodies
Source: eLife journal article supplement (doi:10.7554/elife.104302), 2025-01-07

# Source autoradiograph, figure 1-figure supplement 1

S35 labeled cell lysate pulldown using biotinylated VHH123 and VHH188

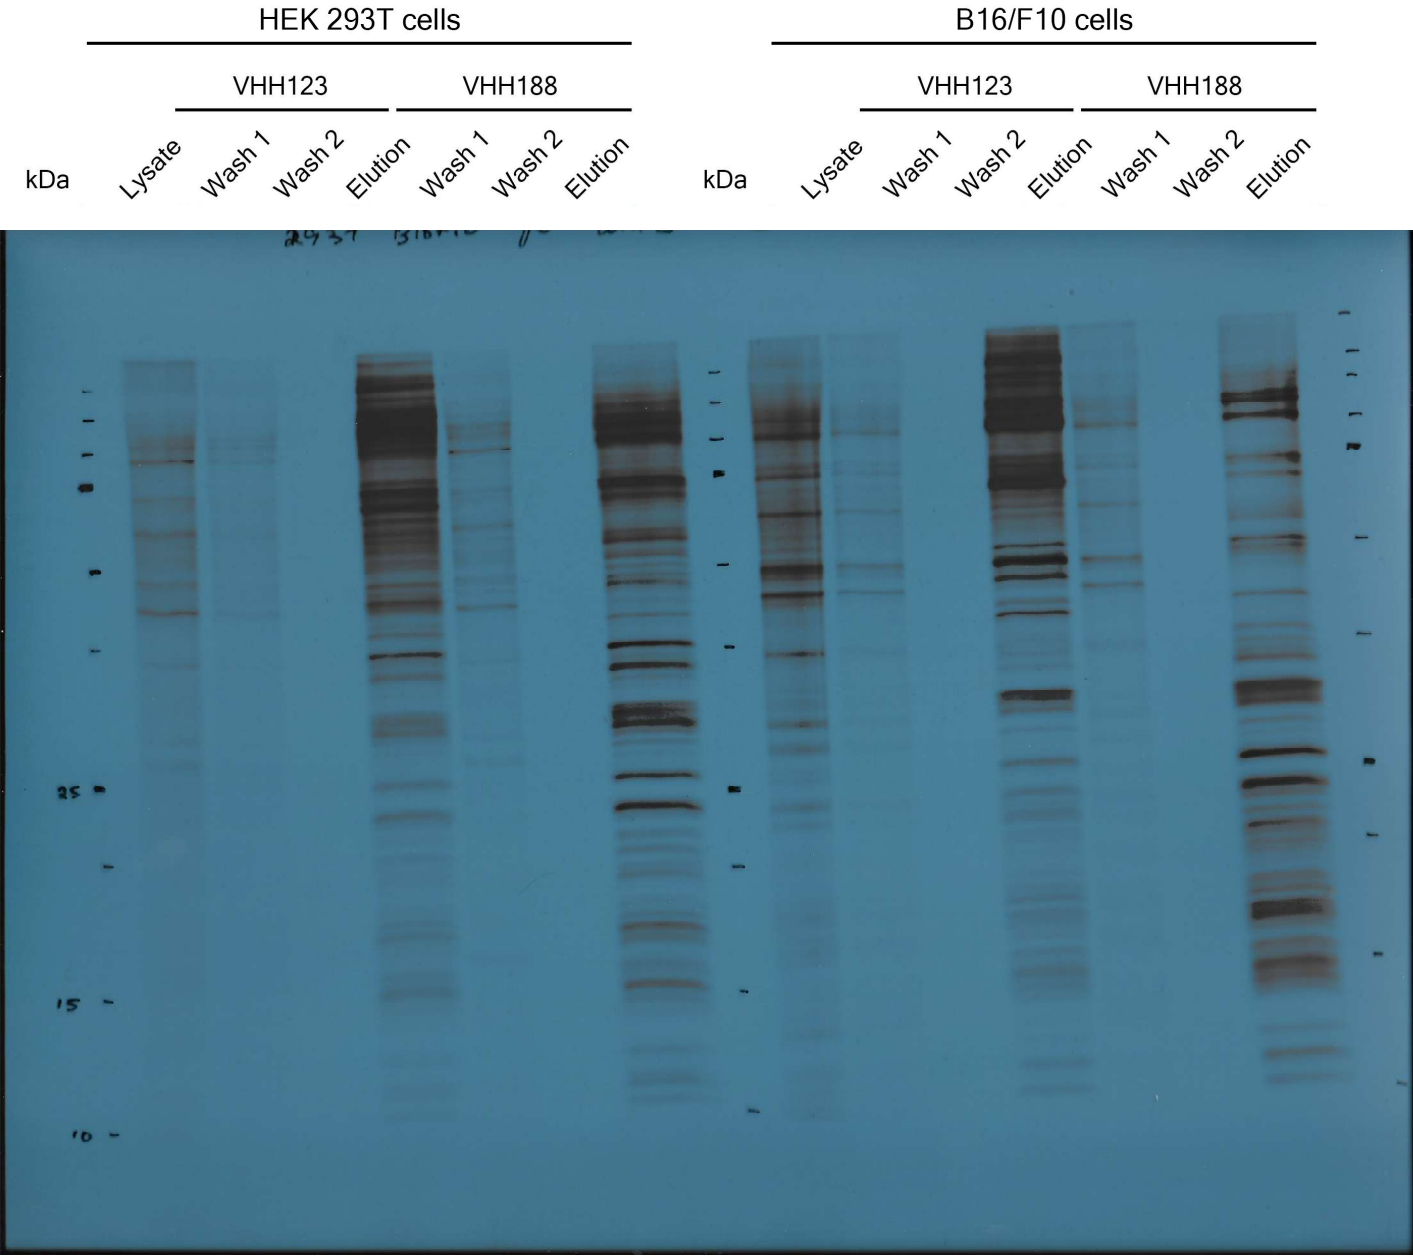

Supplement: fig1-figsupp1-data1 [file elife-104302-fig1-figsupp1-data1-v1.zip]
