# Supplementary material for: A pair of congenic mice for imaging of transplants by positron emission tomography using anti-transferrin receptor nanobodies
Source: eLife journal article supplement (doi:10.7554/elife.104302), 2025-01-07
Supplement: fig2-figsupp2-data1 [file elife-104302-fig2-figsupp2-data1-v1.zip]

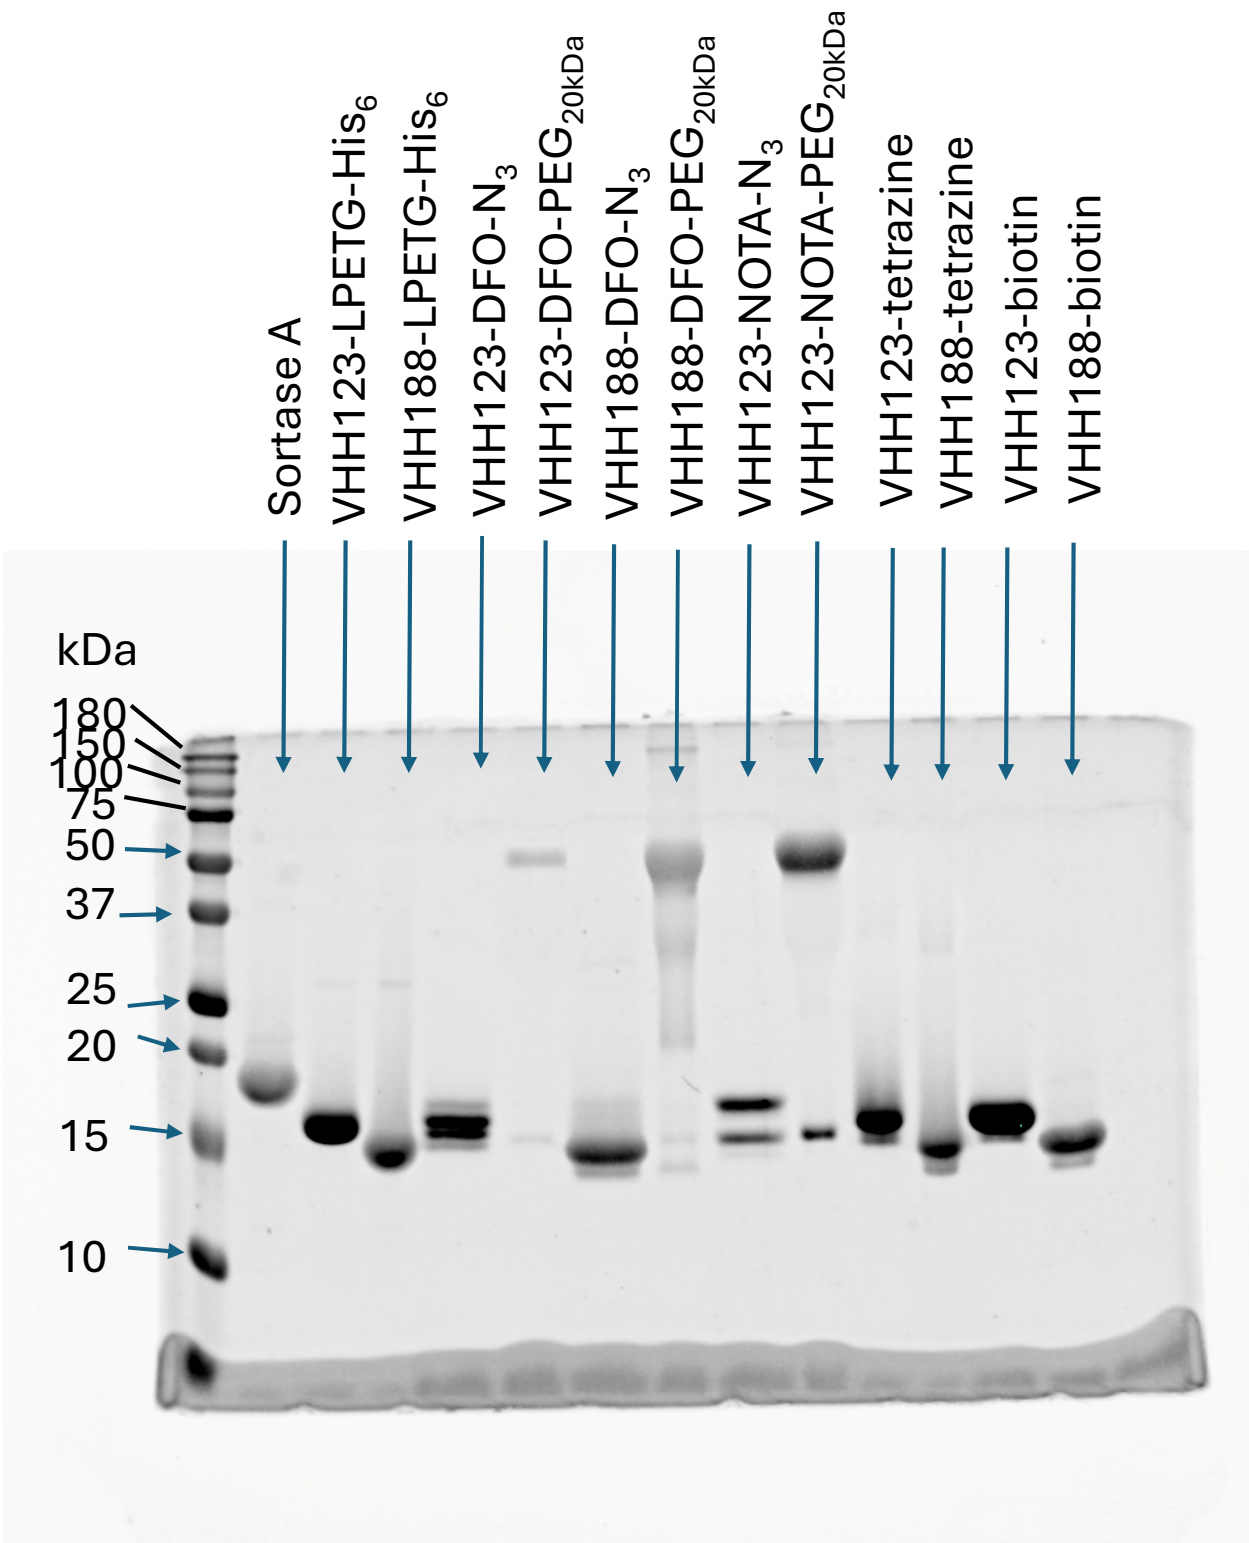

Coomassie stained gel picture

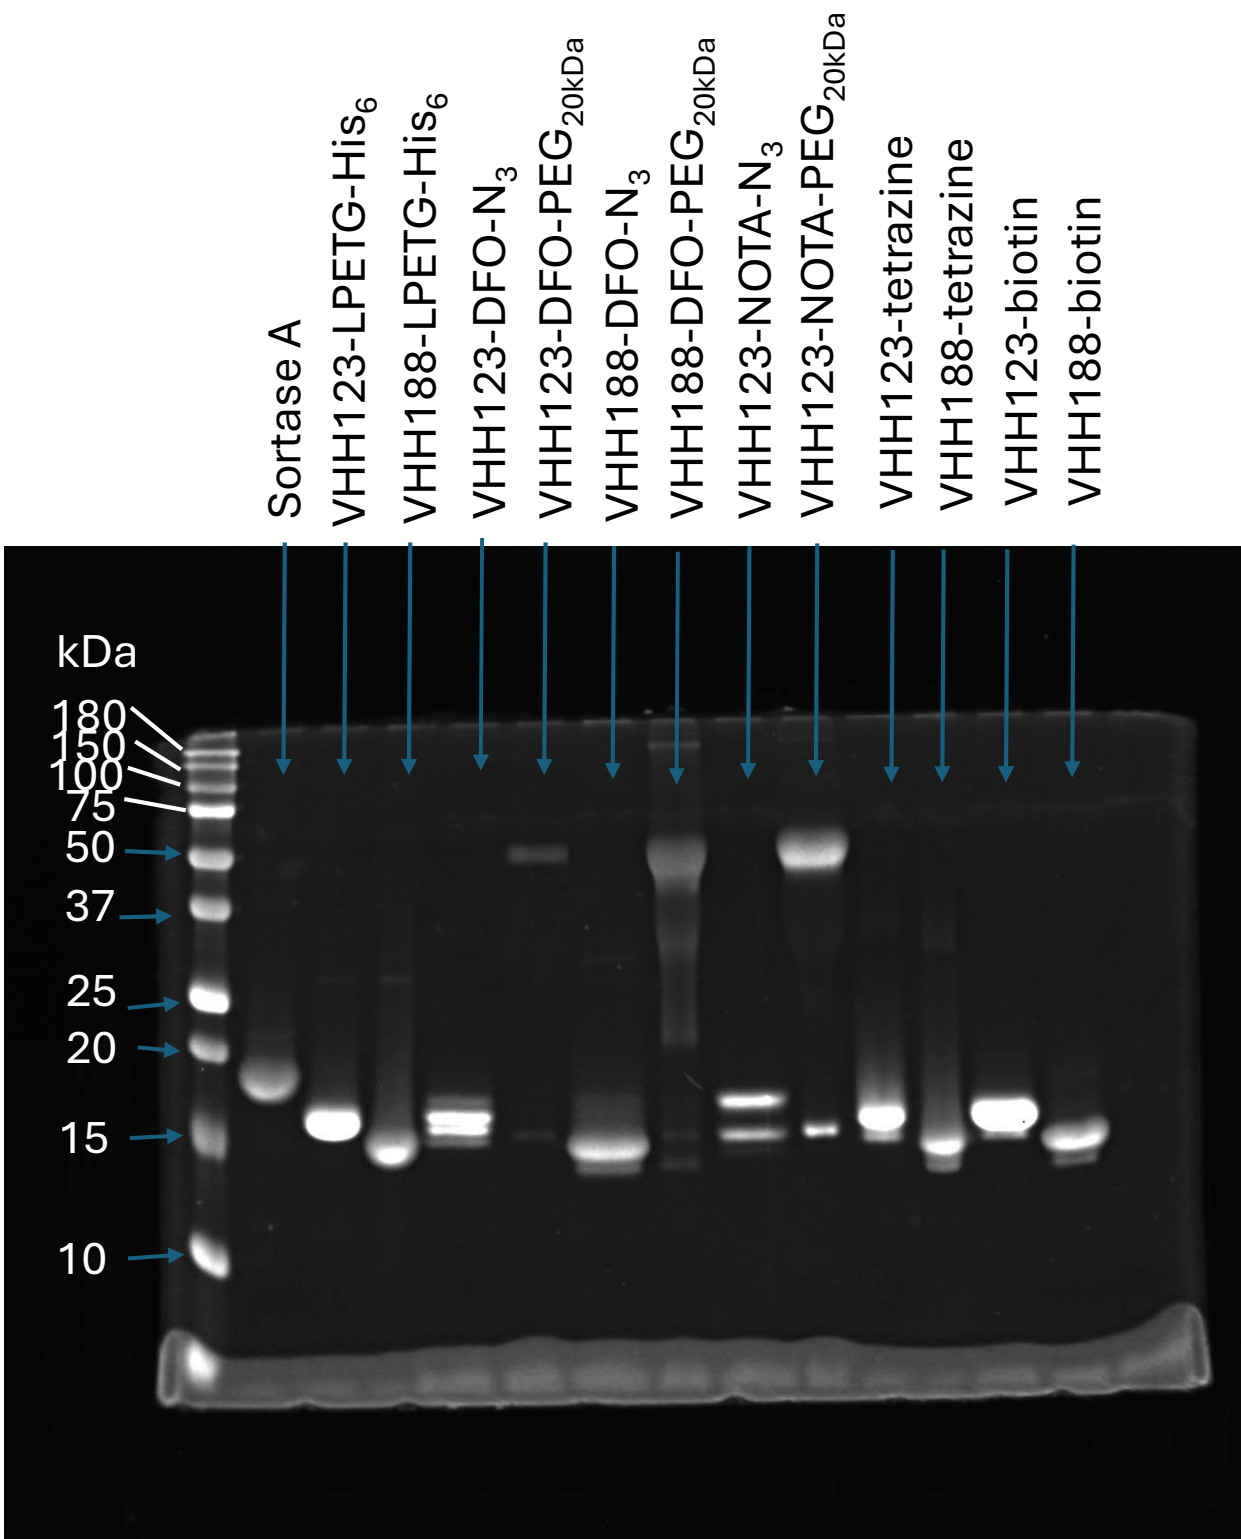

Original file was acquired using a Black Tray and Far Red Epi-light with a BioRad Chemidoc imager.  
The image was then inverted (black <-> white) to produce the picture of Figure 2-figure supplement 2
